# Supplementary material
Source: publisher figshare collection journal article supplement (https://acs.figshare.com/ndownloader/files/16713062)
Supplement: Supplementary file 1 [file 16713062]

## Supporting Information

# Tailored Synthesis of an Unprecedented Pb-Mn Heterometallic Halide Hybrid with Enhanced Emission

Yu Peng,<sup>†,‡,§</sup> Lina Li,<sup>†,\*</sup> Chengmin Ji,<sup>†</sup> Zhenyue Wu,<sup>†,§</sup> Sasa Wang,<sup>†,§</sup> Xitao Liu,<sup>†</sup> Yunpeng Yao,<sup>†,‡</sup> Junhua Luo<sup>†,\*</sup>

<sup>†</sup>State Key Laboratory of Structural Chemistry, Fujian Institute of Research on the Structure of Matter, Chinese Academy of Sciences, Fuzhou, Fujian, 350002, P. R. China

<sup>‡</sup>School of Physical Science and Technology, ShanghaiTech University, Shanghai 201210, China

<sup>§</sup>University of the Chinese Academy of Sciences, Beijing 100049, China

### Experimental details

**Materials and Chemicals:** (*R*)-3-Aminopiperidine dihydrochloride ( $C_5H_{14}Cl_2N_2$ , 98%, Chemical Book), lead (II) acetate trihydrate ( $Pb(Ac)_2 \cdot 3H_2O$ , 99.5%, Aladdin), manganese (II) monoxide ( $MnO$ , 99.5%, Aladdin), hydrochloric acid ( $HCl$ , 36.46%, SCR), Barium sulfate ( $BaSO_4$ , AR, Aladdin). All the chemicals were bought and used without further purification.

**Synthesis and crystal growth:** Crystalline materials of **1** were synthesized by adding  $C_5H_{14}Cl_2N_2$  (0.346 g, 2 mmol) to the concentrated aqueous  $HCl$  solution (20 mL) of the  $Pb(Ac)_2 \cdot 3H_2O$  (1.89 g, 5 mmol). A colorless solution was obtained by heating to boiling under constant magnetic stirring. After cooling to room temperature, we obtained colorless microcrystals of **1**. Crystalline materials of **2** were synthesized by adding  $C_5H_{14}Cl_2N_2$  (0.346 g, 2 mmol) to the concentrated aqueous  $HCl$  solution (20 mL) of  $Pb(Ac)_2 \cdot 3H_2O$  (0.75 g, 2 mmol) and excess  $MnO$  (2 g, 28 mmol). Through heating to boiling under constant magnetic stirring, a yellow solution was obtained. Finally, yellow crystals of **2** were obtained after the solution cooling to 40 °C. Notably, without  $MnO$ , the same proportion ( $C_5H_{12}N_2$  and  $Pb(Ac)_2 \cdot 3H_2O$  were mixed at 1:1 molar ratio) results in colorless needle like crystals as we reported before.<sup>1</sup> The obtained microcrystals of **2** were washed three times using anhydrous ether then dried under vacuum at 50 °C overnight for further characterizations.

**Structural Characterization:** Single crystal X-ray diffraction (SCXRD) was performed on a Bruker D8 diffractometer with  $Mo\ K\alpha$  radiation ( $\lambda = 0.71073$ ). Crystal structures of **1** and **2** were solved by direct methods and then refined by the full-matrix least-squares refinements on  $F^2$  using a *SHELXL* 97 software package. All the non-hydrogen atoms were refined anisotropically based on all reflections with  $I > 2\sigma(I)$ , and the H atoms were generated by geometrical considerations and placed at their idealized positions. Powder X-ray diffraction (PXRD) patterns were collected on a MiniFlex 600, Rigaku, using a  $Cu\ K\alpha$  rotating anode. Element analysis was performed using a Jobin Yvon Ultima-2 Inductively Coupled Plasma Optical Emission Spectrometer (ICP-OES). Thermogravimetric (TG) measurement was conducted on a Netzsch STA 449C thermal analyser in the temperature range of 40 ~ 1100 °C and recorded at heating rate of 10 °C min<sup>-1</sup>.

**Optical Characterization:** The absorption spectra were collected using a PerkinElmer Lambda 900 UV-vis spectrophotometer with an integrating sphere and  $BaSO_4$  was used as the 100% reflectance reference. The excitation spectra, photoluminescence spectra and emission decay of **1** and **2** were acquired at room temperature on a FLS980 spectrofluorometer (Edinburgh Instruments). The PLQEs were obtained using a



FSP920-C spectrometer (Edinburgh Instruments) and were calculated by the equation:  $\eta_Q\gamma = I_S/(E_R - E_S)$ , in which  $I_S$  represents the luminescence emission spectrum of the sample,  $E_R$  is the spectrum of the excitation light from the empty integrated sphere (without the sample), and  $E_S$  is the excitation spectrum for exciting the sample.

**Calculations of band structure:** The calculations of band structures and density of states were performed using *ab initio* first-principle density functional theory method within the total-energy code *CASTEP* program. For the calculations of **1**, the exchange and correlation effects were treated by Perdew-Burke-Ernzerh for solids in the generalized gradient approximation. The core-electrons interactions between the ionic cores and the electrons were described by the norm-conserving pseudo potentials. For the calculations of **2**, Ceperley and Alder (1980) data as parameterized by Perdew and Zunger (1981) in the local density approximation was used to deal exchange and correlation effects. The core-electrons interactions between the ionic cores and the electrons were described by ultrasoft pseudo potentials. Moreover, the spin-orbit coupling effect was taken into account for the band structure calculations of **2**.

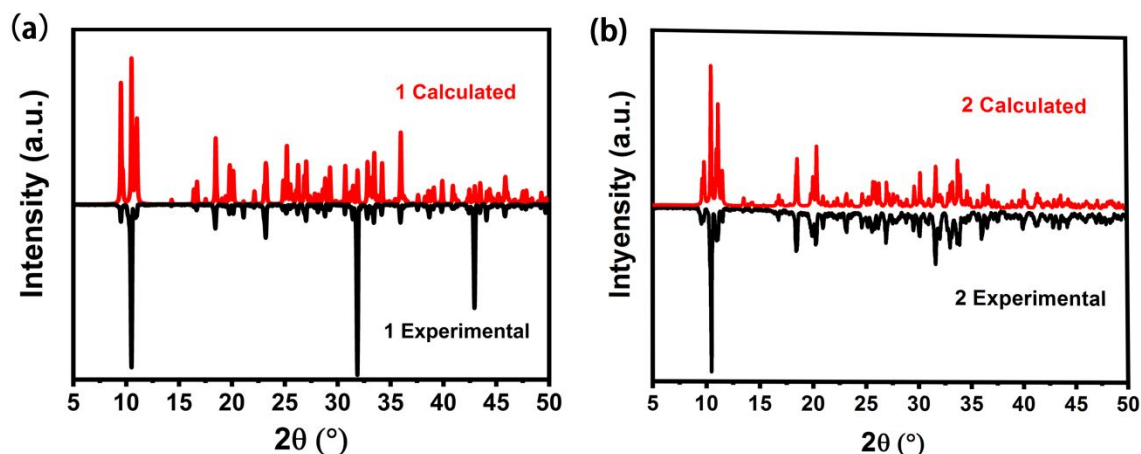

**Figure S1.** Patterns of the powder X-rays diffraction (PXRD) match well with the simulated ones, verifying the purity of the bulk phase of **1** and **2**.



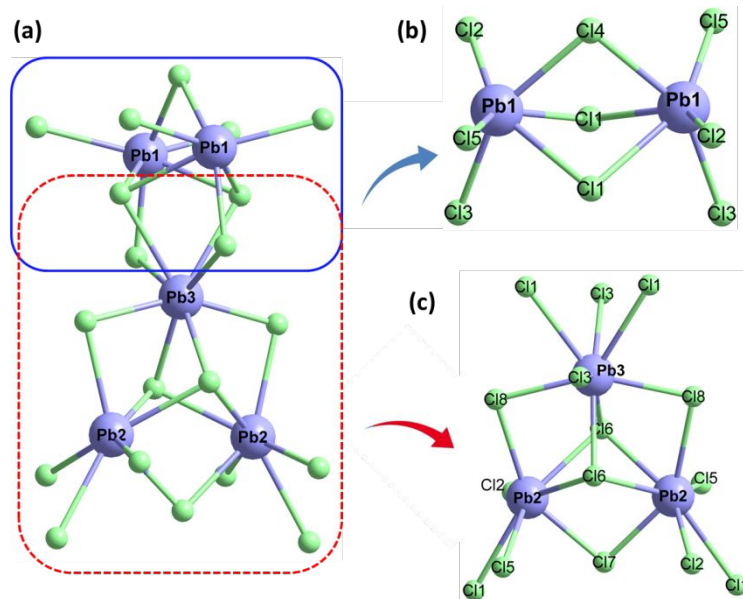

**Figure S2.** (a) A structural motif of the inorganic part for **1**. The  $\text{Pb}_2\text{Cl}_9$  dimer (b) and the firm  $\text{Pb}_3\text{Cl}_{15}$  trimer (c) in the structural motif.

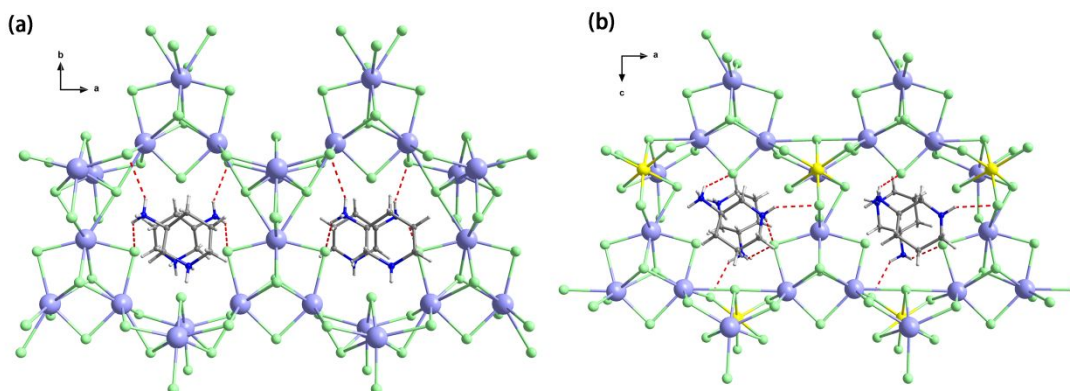

**Figure S3.** The  $\text{N-H}\cdots\text{Cl}$  hydrogen-bonding interactions between organic cations and inorganic metal halide net of **1** (a) and **2** (b).



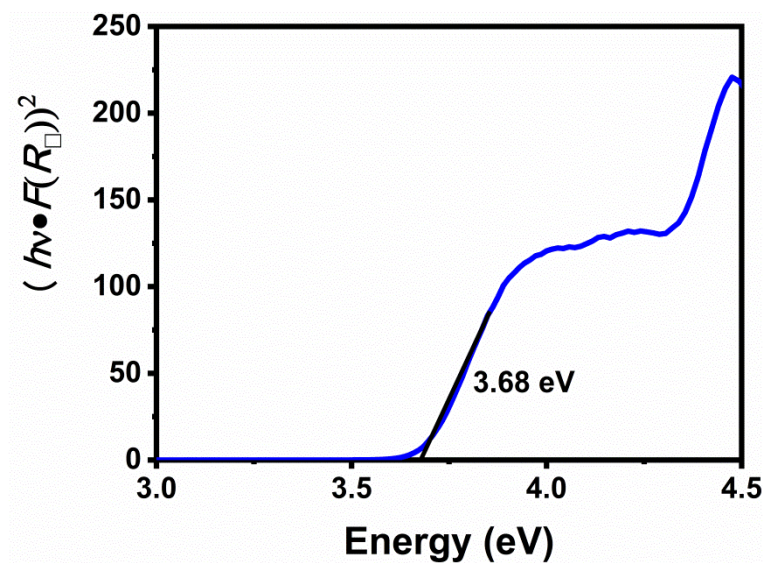

Figure S4. Tauc plot for **1**.

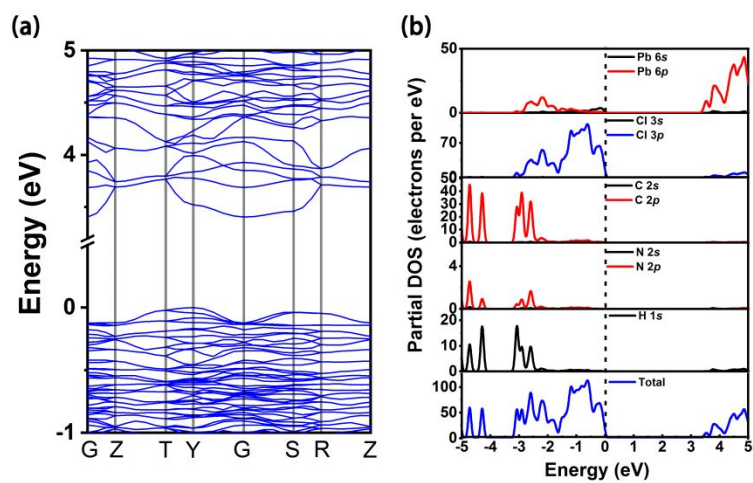

Figure S5. (a) The calculated band structure of **1**. (b) The partial density of states (PDOS) of **1**.



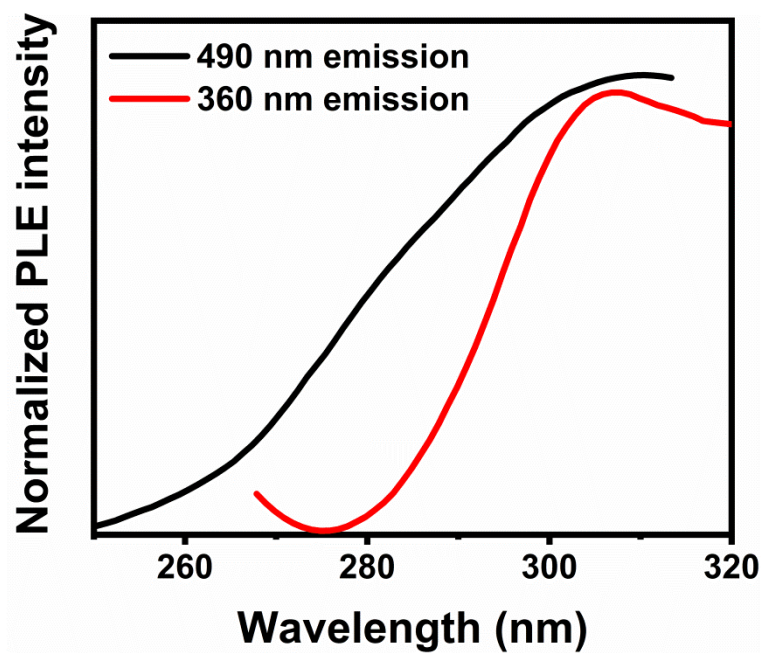

**Figure S6.** Excitation spectra for the 360 and 490 nm emissions of **1**.

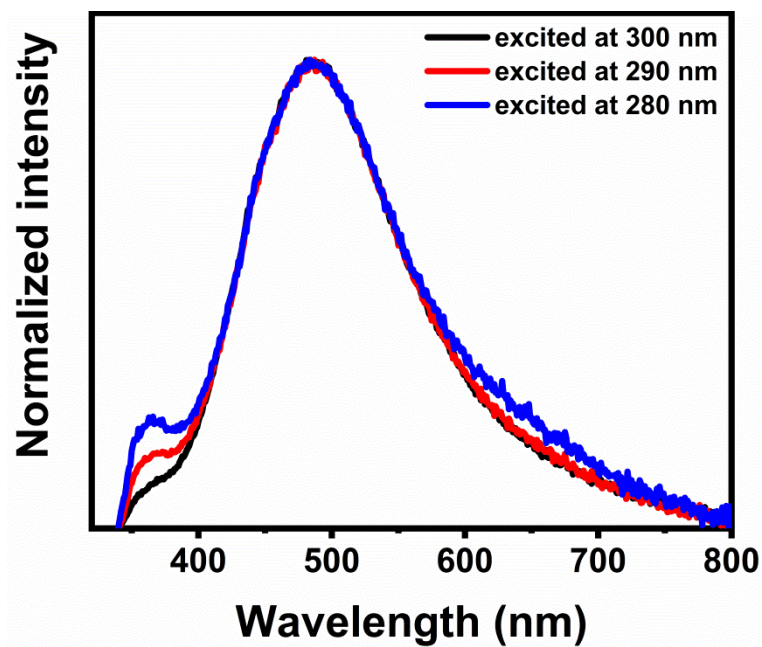

**Figure S7.** Emission spectra of **1** at different excitation wavelengths.



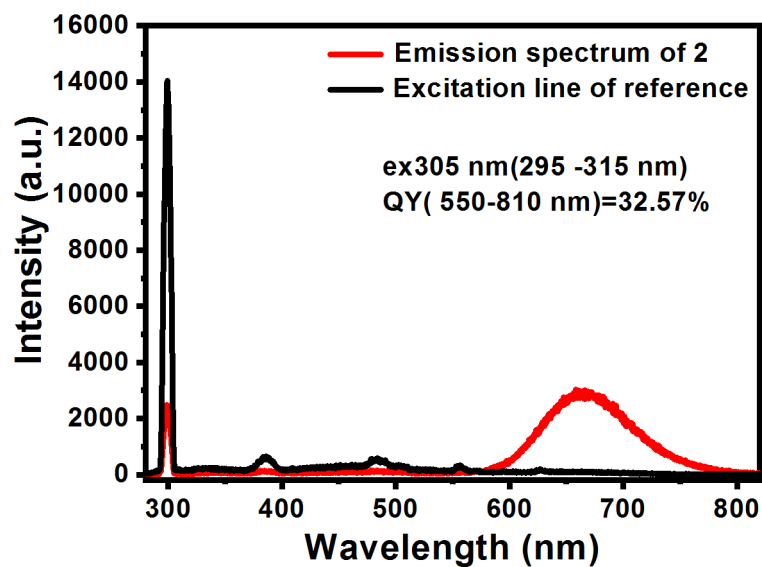

**Figure S8.** Excitation line of reference and emission spectrum of freshly synthesized **2** with the excitation wavelength of 305 nm collected by an integrating sphere.

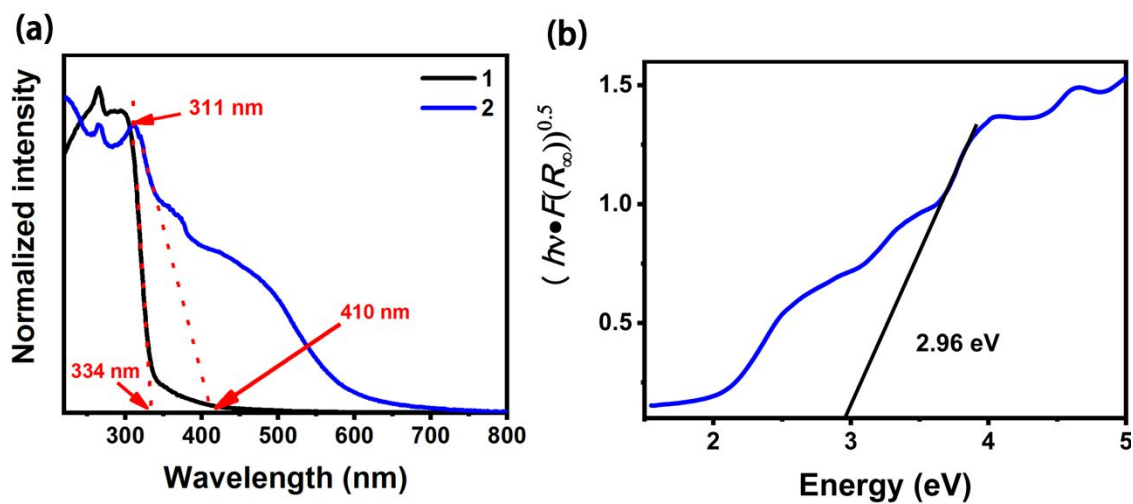

**Figure S9.** (a) normalized absorption spectra of **1** and **2**. (b) Tauc plot for **2**.



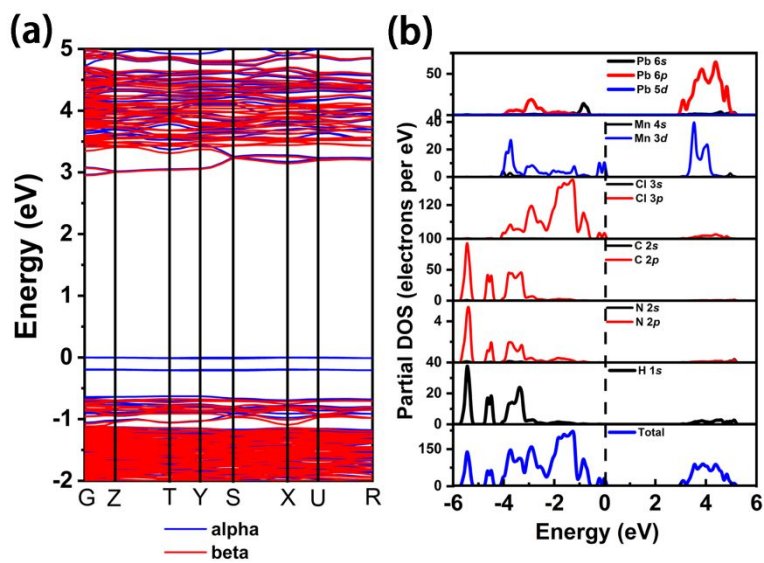

**Figure S10.** (a) The calculated band structure of **2**. (b) The partial density of states (PDOS) of **2**.

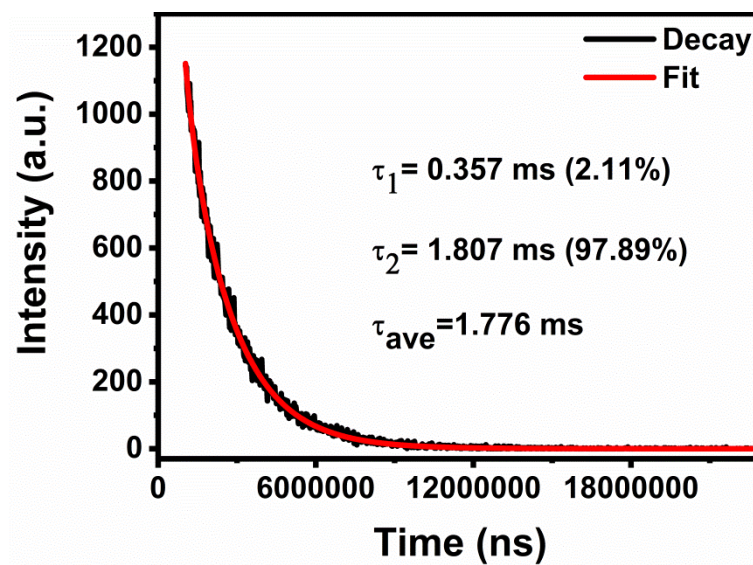

**Figure S11.** Photoluminescence decay of **2** (measured at 678 nm) at room temperature.



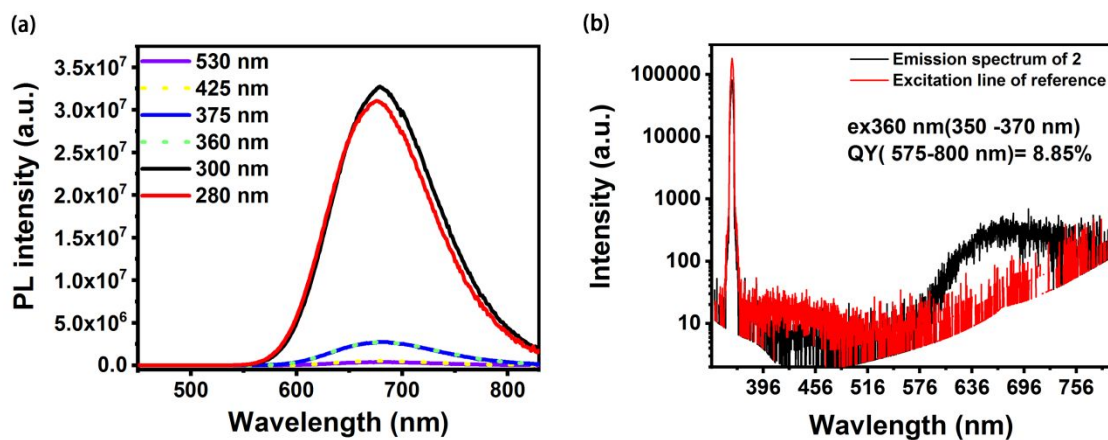

**Figure S12.** (a) Emission spectra of **2** upon different excitation wavelengths. (b) Excitation line of reference and emission spectrum of freshly synthesized **2** with the excitation wavelength of 360 nm collected by an integrating sphere.

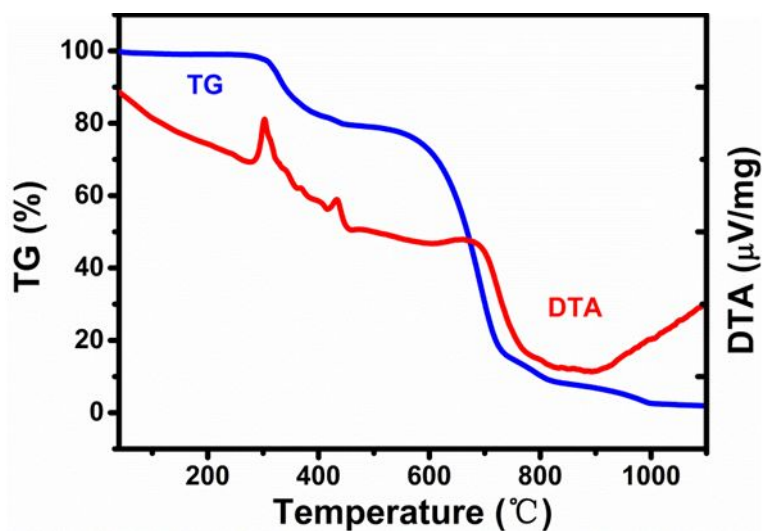

**Figure S13.** TG and DTA heating curves of **2**.



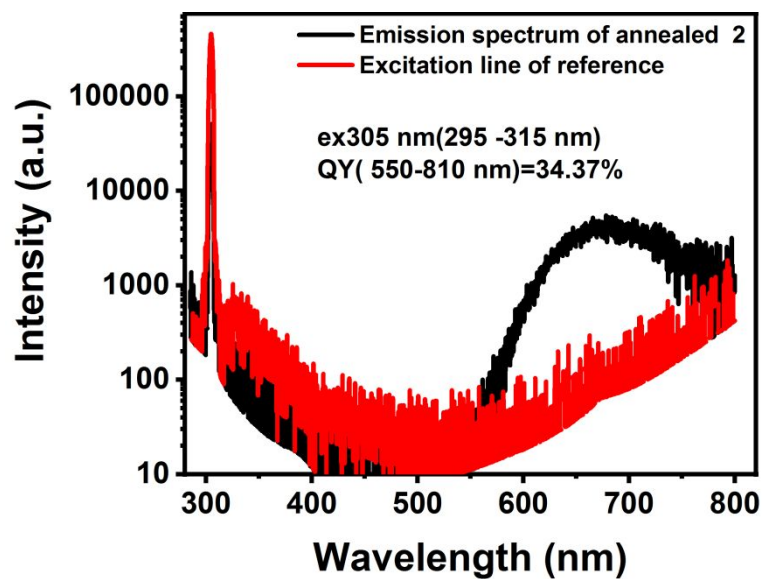

Figure S14. Temperature evolution for PL emission spectra of heterometallic halide hybrid 2.

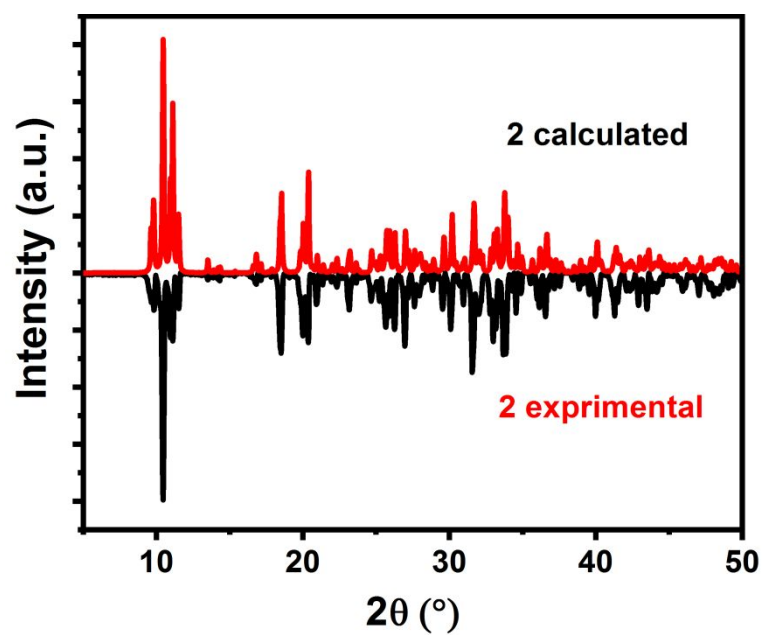

Figure S15 PXRD pattern of 2 after annealed at 120 °C for 10 hour .



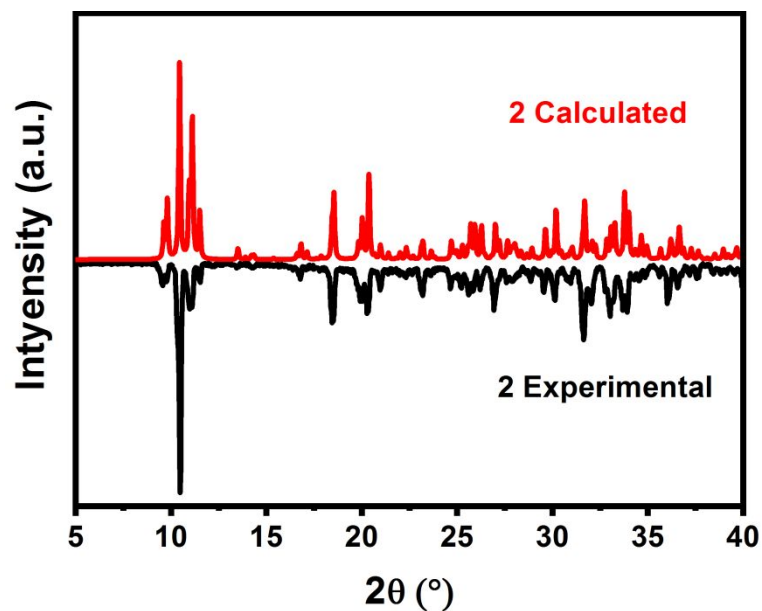

**Figure S16.** PXRD pattern of **2** after exposed to ambient condition for three month.

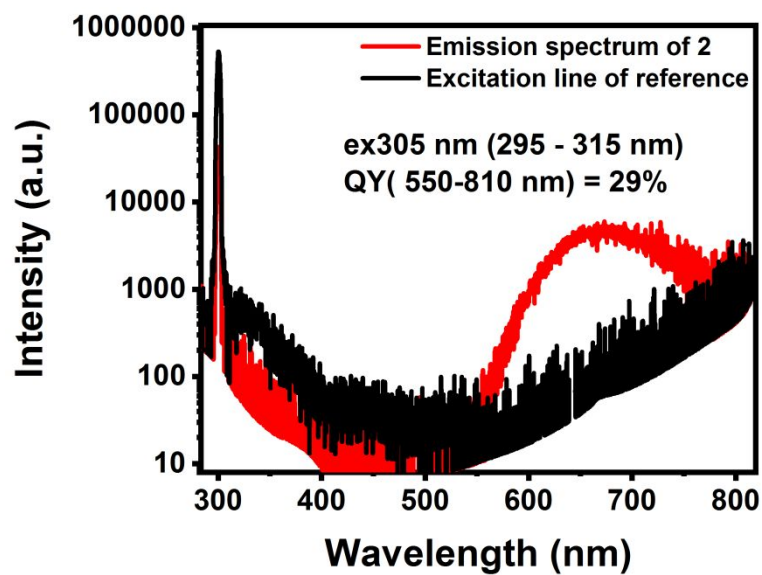

**Figure S17.** Excitation line of reference and emission spectrum of **2** exposed to ambient condition for three month collected by an integrating sphere.



**Table S1.** Crystal data and structure refinement for **1** and **2**.

| Identification code                                  | <b>1</b>                                                                                       | <b>2</b>                                                                                         |
|------------------------------------------------------|------------------------------------------------------------------------------------------------|--------------------------------------------------------------------------------------------------|
| Formula                                              | (C <sub>5</sub> H <sub>14</sub> N <sub>2</sub> ) <sub>2</sub> Pb <sub>5</sub> Cl <sub>14</sub> | (C <sub>5</sub> H <sub>14</sub> N <sub>2</sub> ) <sub>2</sub> Pb <sub>4</sub> MnCl <sub>14</sub> |
| Formula weight (g/mol)                               | 1734.60                                                                                        | 1584.36                                                                                          |
| Temperature (K)                                      | 285.15                                                                                         | 200.15                                                                                           |
| Crystal system                                       | orthorhombic                                                                                   | orthorhombic                                                                                     |
| Space group                                          | <i>C</i> 222 <sub>1</sub>                                                                      | <i>P</i> 2 <sub>1</sub> 2 <sub>1</sub> 2 <sub>1</sub>                                            |
| <i>a</i> (Å)                                         | 10.7997(4)                                                                                     | 10.3435(3)                                                                                       |
| <i>b</i> (Å)                                         | 18.2694(6)                                                                                     | 16.9247(6)                                                                                       |
| <i>c</i> (Å)                                         | 16.8270(6)                                                                                     | 18.3660(7)                                                                                       |
| $\alpha$ (°)                                         | 90.00                                                                                          | 90.00                                                                                            |
| $\beta$ (°)                                          | 90.00                                                                                          | 90.00                                                                                            |
| $\gamma$ (°)                                         | 90.00                                                                                          | 90.00                                                                                            |
| Volume (Å <sup>3</sup> )                             | 3320.0(2)                                                                                      | 3215.16(19)                                                                                      |
| <i>Z</i>                                             | 4                                                                                              | 4                                                                                                |
| $\rho_{\text{calc}}$ (g/cm <sup>3</sup> )            | 3.470                                                                                          | 3.273                                                                                            |
| <i>F</i> (000)                                       | 3048.0                                                                                         | 2828.0                                                                                           |
| Radiation                                            | Mo <i>K</i> <sub>α</sub> ( $\lambda$ = 0.71073)                                                | Mo <i>K</i> <sub>α</sub> ( $\lambda$ = 0.71073)                                                  |
| <i>S</i>                                             | 4.38 to 50.06                                                                                  | 4.44 to 52.74                                                                                    |
| limiting indices                                     | -12 ≤ <i>h</i> ≤ 12,<br>-20 ≤ <i>k</i> ≤ 21,<br>-19 ≤ <i>l</i> ≤ 20                            | -11 ≤ <i>h</i> ≤ 12,<br>-21 ≤ <i>k</i> ≤ 19,<br>-22 ≤ <i>l</i> ≤ 22                              |
| Reflections collected/unique                         | 9839/2931                                                                                      | 19997/6190                                                                                       |
| Data/restraints/parameters                           | 2931/57/152                                                                                    | 6190/114/301                                                                                     |
| GOF                                                  | 1.083                                                                                          | 1.011                                                                                            |
| Final <i>R</i> indexes [ <i>I</i> ≥ 2σ ( <i>I</i> )] | <i>R</i> <sub>1</sub> = 0.0453, <i>wR</i> <sub>2</sub> = 0.0977                                | <i>R</i> <sub>1</sub> = 0.0475, <i>wR</i> <sub>2</sub> = 0.1146                                  |
| Final <i>R</i> indexes [all data]                    | <i>R</i> <sub>1</sub> = 0.0624, <i>wR</i> <sub>2</sub> = 0.1058                                | <i>R</i> <sub>1</sub> = 0.0576, <i>wR</i> <sub>2</sub> = 0.1257                                  |

**Table S2.** Bond lengths for **1**.

| Atom | Atom             | Length/Å  | Atom | Atom             | Length/Å  |
|------|------------------|-----------|------|------------------|-----------|
| Pb3  | Cl6              | 2.872(5)  | Pb1  | Cl1              | 2.991(10) |
| Pb3  | Cl6 <sup>1</sup> | 2.872(5)  | Pb1  | Cl1 <sup>4</sup> | 2.926(11) |
| Pb3  | Cl1 <sup>2</sup> | 3.215(5)  | Pb1  | Cl4              | 2.901(5)  |
| Pb3  | Cl1 <sup>3</sup> | 3.215(5)  | Pb1  | Cl2              | 2.849(9)  |
| Pb3  | Cl8 <sup>1</sup> | 2.851(5)  | Pb1  | Cl5              | 3.002(9)  |
| Pb3  | Cl8              | 2.851(5)  | Pb1  | Cl3              | 2.784(6)  |
| Pb3  | Cl3 <sup>2</sup> | 3.215(7)  | Pb2  | Cl1 <sup>4</sup> | 3.202(5)  |
| Pb2  | Cl6 <sup>1</sup> | 2.927(10) | Pb2  | Cl8              | 3.076(5)  |
| Pb2  | Cl6              | 3.007(10) | Pb2  | Cl2 <sup>4</sup> | 2.900(12) |
| Pb2  | Cl7              | 2.842(5)  | Pb2  | Cl5              | 3.050(11) |

Symmetry transformations used to generate equivalent atoms:

<sup>1</sup>1-x,+y,1/2-z; <sup>2</sup>-1/2+x,-1/2+y,+z; <sup>3</sup>1/2-x,-1/2+y,1/2-z; <sup>4</sup>1-x,+y,1/2-z



**Table S2.** Bond lengths for **2**.

| Atom | Atom              | Length/Å | Atom | Atom              | Length/Å |
|------|-------------------|----------|------|-------------------|----------|
| Pb1  | Cl13 <sup>1</sup> | 3.168(5) | Pb4  | Cl10              | 2.931(5) |
| Pb1  | Cl7               | 2.923(6) | Pb4  | Cl4 <sup>4</sup>  | 2.830(6) |
| Pb1  | Cl3               | 2.875(5) | Pb4  | Cl9               | 2.947(6) |
| Pb1  | Cl5               | 2.988(5) | Cl13 | Mn1               | 2.587(6) |
| Pb1  | Cl2               | 2.889(6) | Cl11 | Mn1               | 2.725(7) |
| Pb1  | Cl1               | 2.883(6) | Mn1  | Cl10              | 2.624(5) |
| Pb2  | Cl7               | 2.967(5) | Mn1  | Cl8               | 2.442(7) |
| Pb2  | Cl3               | 2.950(5) | Mn1  | Cl14              | 2.448(5) |
| Pb2  | Cl5               | 2.932(5) | Mn1  | Cl12              | 2.508(7) |
| Pb2  | Cl6               | 2.848(5) | Pb3  | Cl1               | 2.864(5) |
| Pb2  | Cl10              | 3.134(5) | Pb3  | Cl10 <sup>2</sup> | 3.123(5) |
| Pb2  | Cl8               | 3.023(7) | Pb3  | Cl12 <sup>2</sup> | 3.192(7) |
| Pb2  | Cl9               | 3.003(7) | Pb3  | Cl4               | 2.850(6) |
| Pb3  | Cl3               | 3.015(5) | Pb4  | Cl13              | 2.926(6) |
| Pb3  | Cl5               | 2.872(5) | Pb4  | Cl11              | 2.961(6) |
| Pb3  | Cl6               | 2.970(5) | Pb4  | Cl2 <sup>3</sup>  | 2.905(5) |

Symmetry transformations used to generate equivalent atoms:

<sup>1</sup>1/2-x,-1-y,-1/2+z; <sup>2</sup>1+x,+y,+z; <sup>3</sup>1/2-x,-1-y,1/2+z; <sup>4</sup>-1+x,+y,+z

(1) Y. Peng, Y. Yao, L. Li, Z. Wu, S. Wang and J. Luo, White-light emission in a chiral one-dimensional organic–inorganic hybrid perovskite, *J. Mater. Chem. C*, **2018**, *6*, 6033–6037.
